# Supplementary material
Source: PubMed Central journal article supplement (PMC2993466)
Supplement: supp_mol.110.066100_supp_figure_1.pdf [file supp_mol.110.066100_supp_figure_1.pdf]

Journal title : Molecular pharmacology

Title : The specific slow afterhyperpolarization inhibitor UCL2077 is a subtype-selective blocker of the epilepsy associated KCNQ channels

Authors : Heun Soh and Anasatsios Tzingounis

## Supp. Figure 1

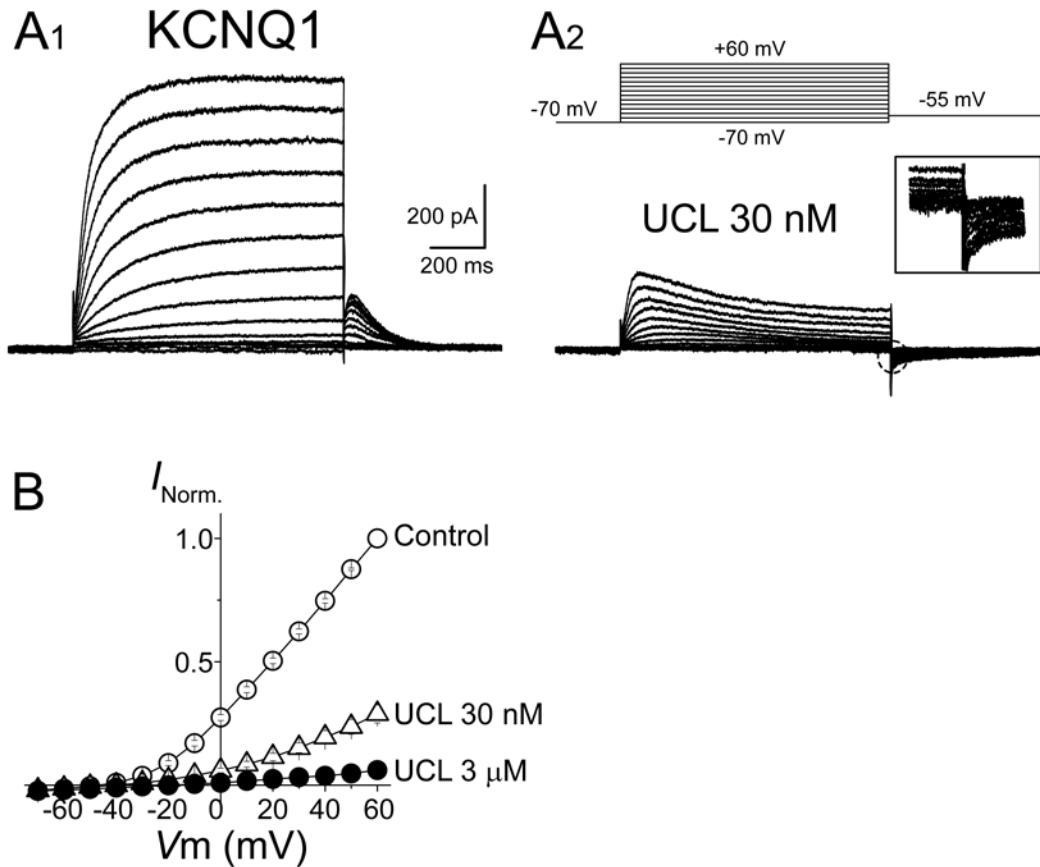

### Figure S1. UCL2077 inhibits KCNQ1 channels with nanomolar potency.

Representative current traces at different membrane potentials from heterologous cells expressing KCNQ1 before (A1) and after (A2) applications of 30 nM UCL2077. (B) Current-to-voltage relationships for KCNQ1 channels. Normalized peak current values were plotted against test potentials before (open circles) and after (open triangles) application of 30 nM UCL2077. For these experiments, KCNQ1 currents were elicited by a 1 s depolarization from -70 mV to test potentials from -70 mV to 60 mV in 10 mV increments, and then returned to -55 mV (protocol shown in top panel in A2).
